# Supplementary material
Source: PubMed Central journal article supplement (PMC1472413)

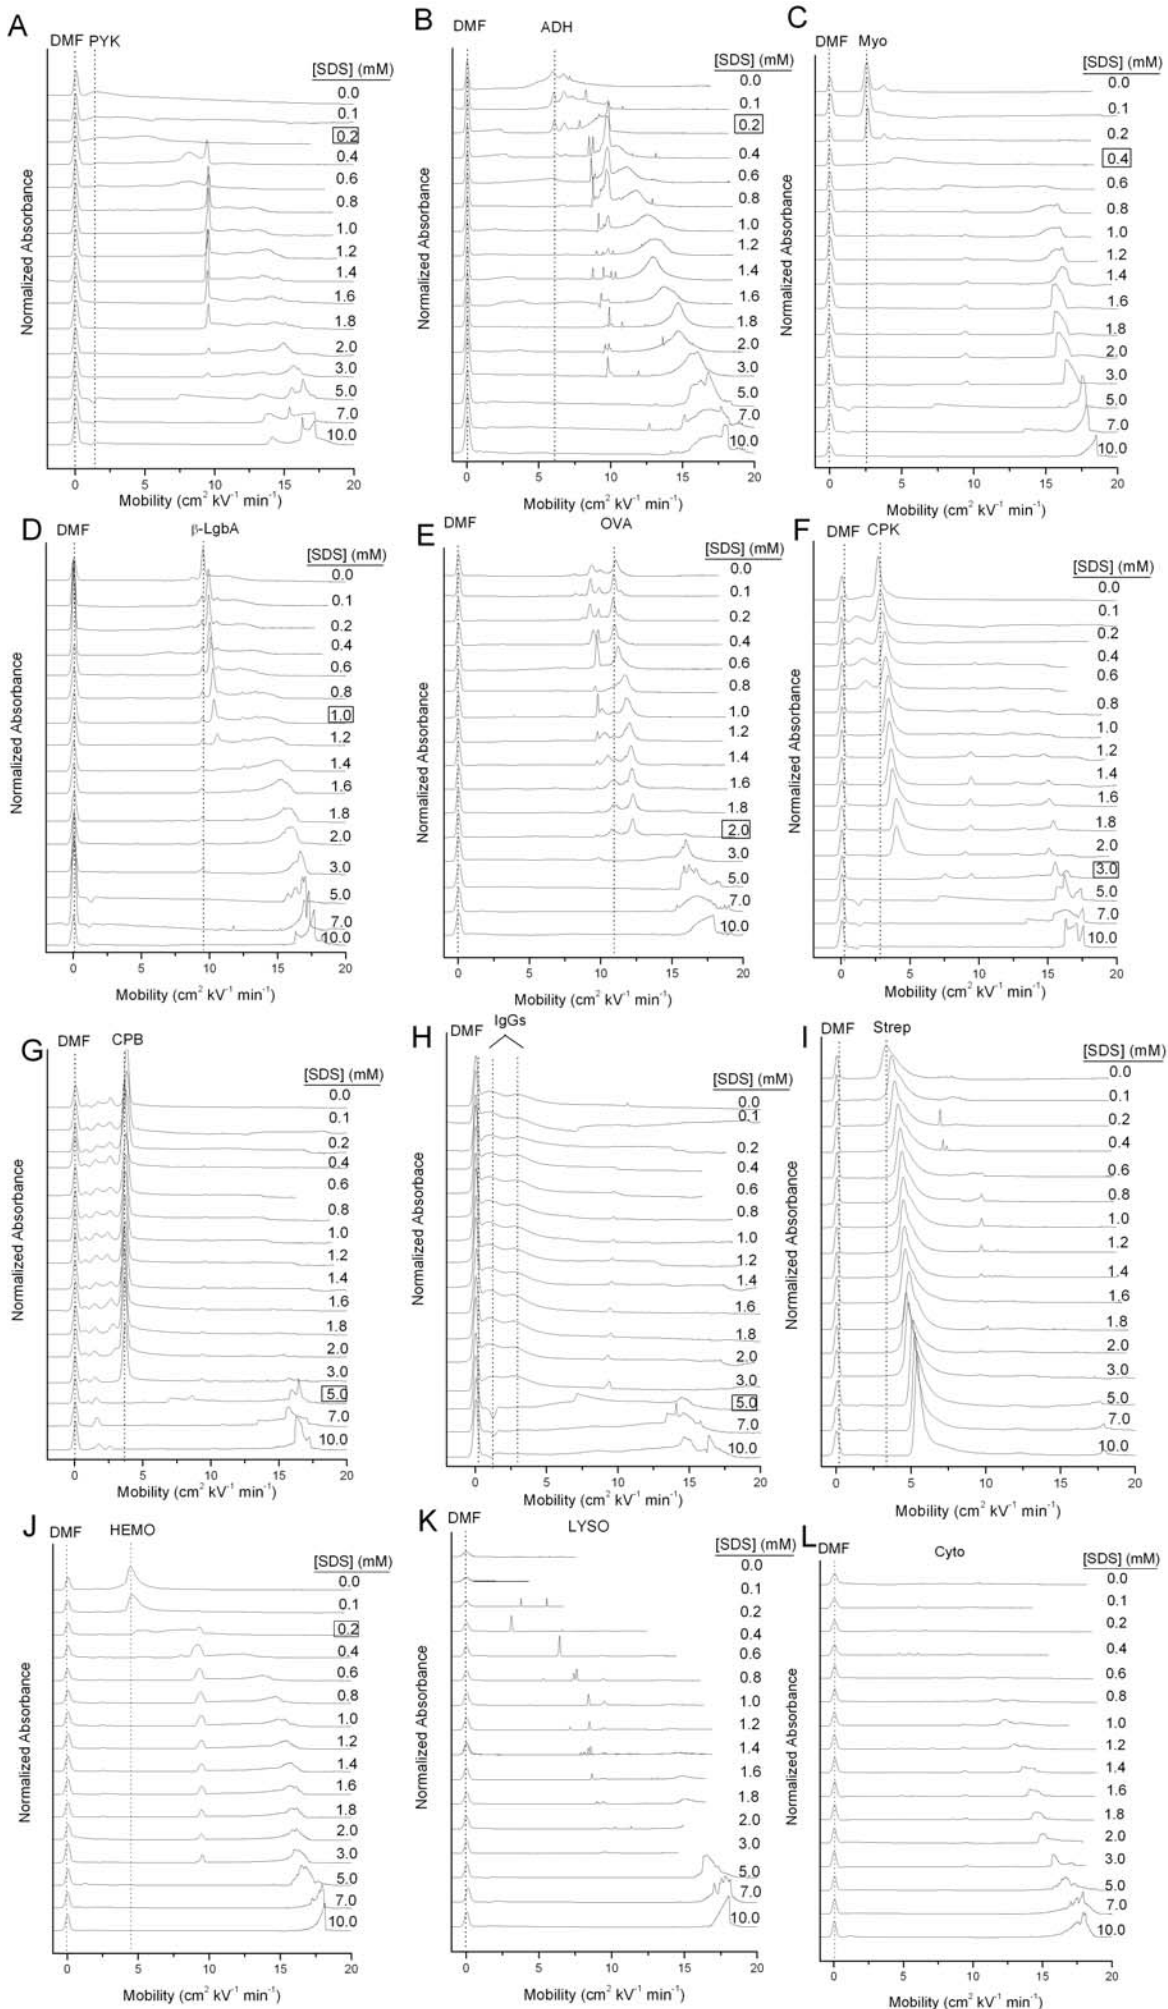

Supplement: pnas_0602816103_1.pdf [file pnas_0602816103_1.pdf]

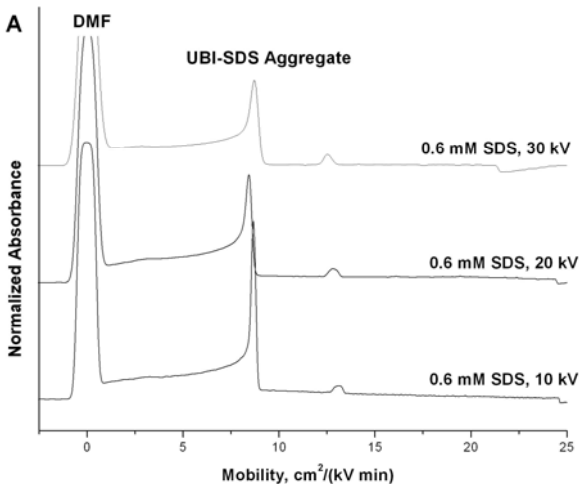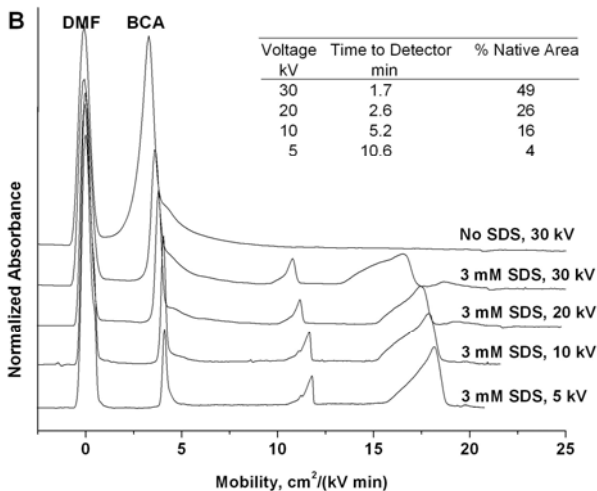

Supplement: pnas_0602816103_2.pdf [file pnas_0602816103_2.pdf]

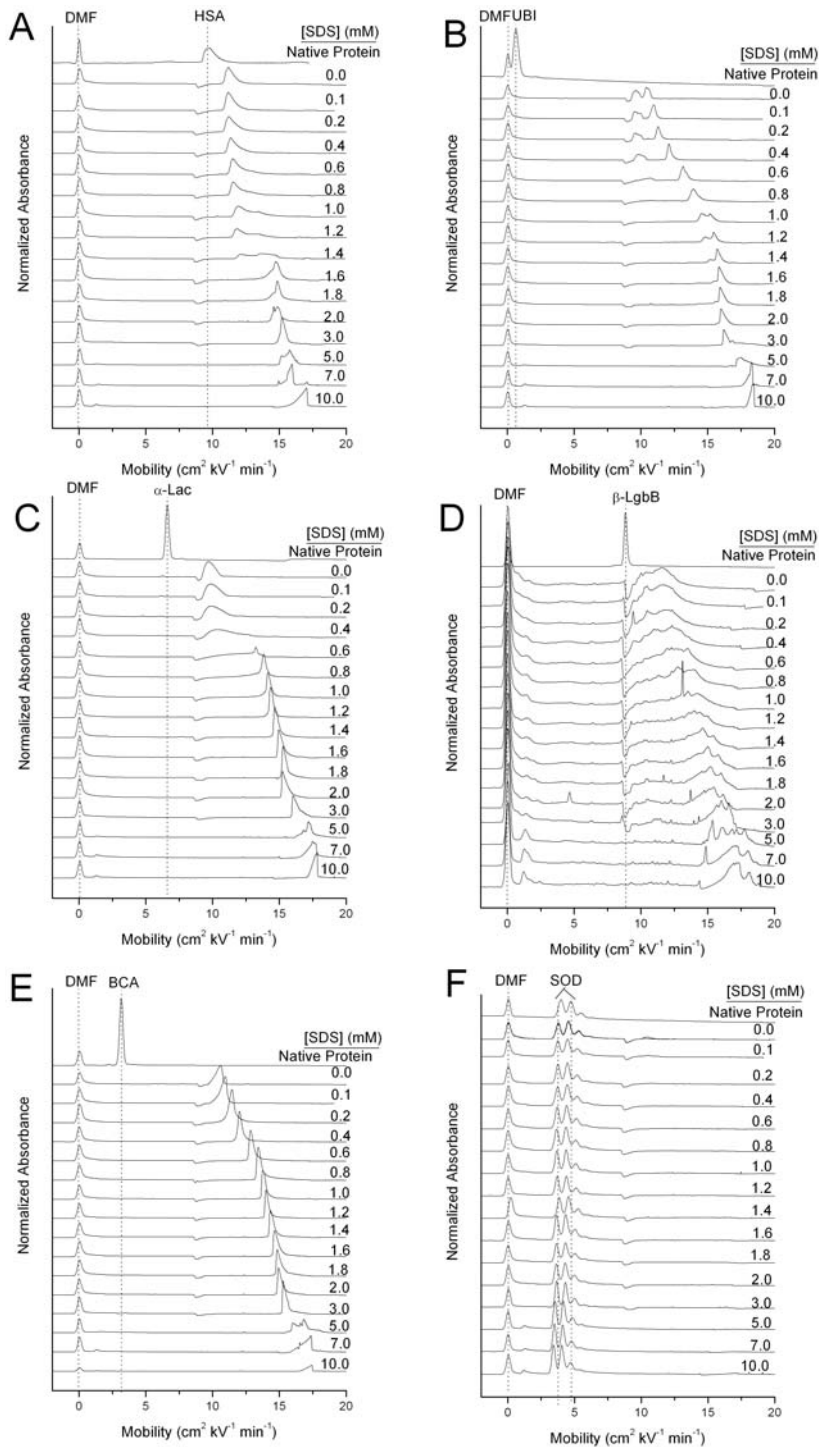

Supplement: pnas_0602816103_3.pdf [file pnas_0602816103_3.pdf]

DMF

HSA

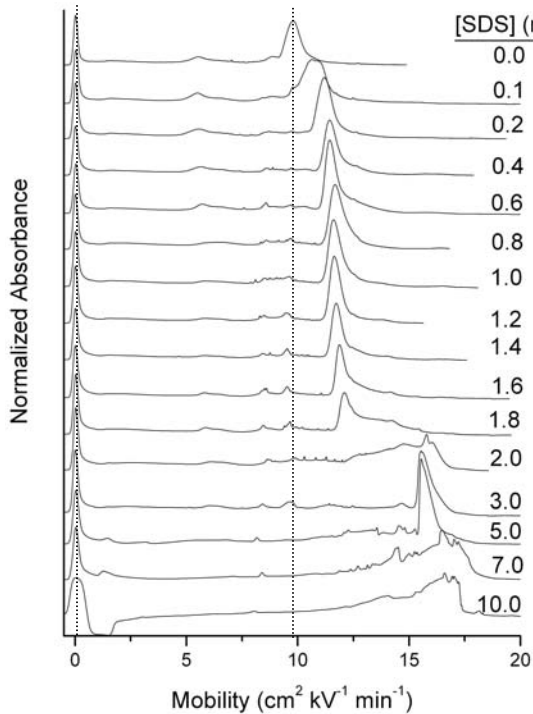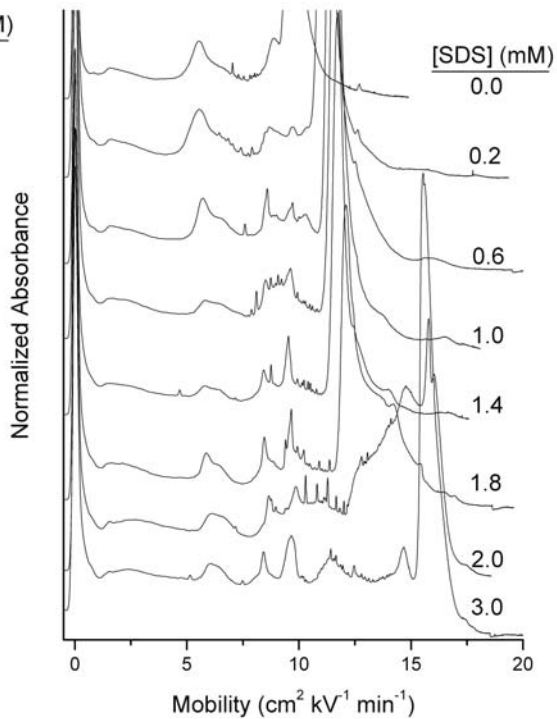

Supplement: pnas_0602816103_4.pdf [file pnas_0602816103_4.pdf]
